# Supplementary material for: Cardiac Ischemia On-a-Chip: Antiarrhythmic Effect of Levosimendan on Ischemic Human-Induced Pluripotent Stem Cell-Derived Cardiomyocytes
Source: Cells. 2022 Mar 19;11(6):1045. doi: 10.3390/cells11061045 (PMC8947267; doi:10.3390/cells11061045)
Supplement: Supplementary file 1 [file cells-11-01045-s001.zip]

Archive with 17 entries (17 files):
- cells-1604501-supplementary.v6. update.pdf
- Movie 10_Hypoxia_Abnormal beating rhythm_Irregular Phase.mp4
- Movie 11_Hypoxia_Abnormal beating rhythm_Douple Peaks.mp4
- Movie 12_Hypoxia_Abnormal beating rhythm_Multiple Peaks.mp4
- Movie 13_Hypoxia_Abnormal beating rhythm_Prolonged Rise.mp4
- Movie 14_Hypoxia_Abnormal beating rhythm_Plateau Abnormality.mp4
- Movie 15_Hypoxia_Abnormal beating rhythm_Low peaks.mp4
- Movie 16_Hypoxia_Abnormal beating rhythm_High Peaks.mp4
- Movie 1_Control_Normal Ca transient.mp4
- Movie 2_Hypoxia_Abnormal Ca transient_Irregular Phase.mp4
- Movie 3_Hypoxia_Abnormal Ca transient_Douple Phase.mp4
- Movie 4_Hypoxia_Abnormal Ca transient_Multiple peaks.mp4
- Movie 5_Hypoxia_Abnormal Ca transient_Prolonged Rise.mp4
- Movie 6_Hypoxia_Abnormal Ca transient_Plateau Abnormality.mp4
- Movie 7_Hypoxia_Abnormal Ca transient_Low Peaks.mp4
- Movie 8_Hypoxia_Abnormal Ca transient_High Peaks.mp4
- Movie 9_Control_Normal beating rhythm.mp4
